# Supplementary material for: The Secreted Metabolome of Hela Cells under Effect of Crotamine, a Cell-Penetrating Peptide from a Rattlesnake Using NMR-Based Metabolomics Analyses
Source: MDPI journal article supplement (doi:10.3390/biomed2020020), 2022-04-22
Supplement: s1 [file s1]

Archive with 1 entries (1 files):
- biomed-1591142-supplementary material S1.pdf
