# Supplementary material for: The Secreted Metabolome of Hela Cells under Effect of Crotamine, a Cell-Penetrating Peptide from a Rattlesnake Using NMR-Based Metabolomics Analyses
Source: MDPI journal article supplement (doi:10.3390/biomed2020020), 2022-04-22
Supplement: s1 [file s1 › biomed-1591142-supplementary material S1.pdf]

# ACETATE

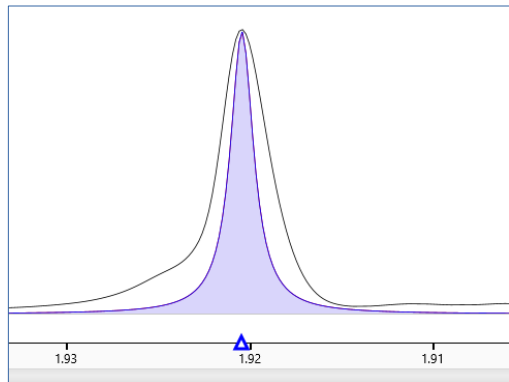

Spectrum fit using Chenomx NMR suite 9.0. Reference spectrum from crotamine treated cells. Black lines are from real NMR spectrum while blue shadows are metabolite signals from the Chenomx library. Chemical shift values may be observed on the x-axis.

# ETHANOL

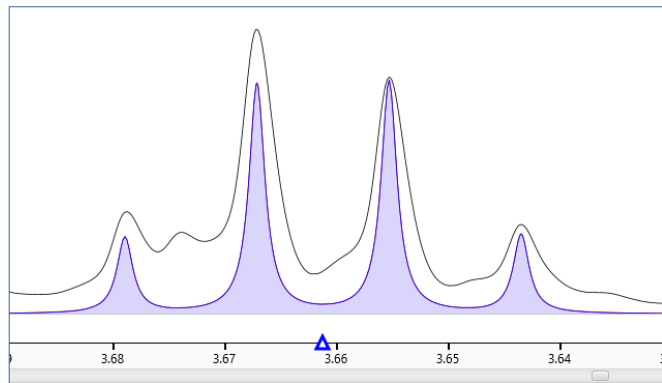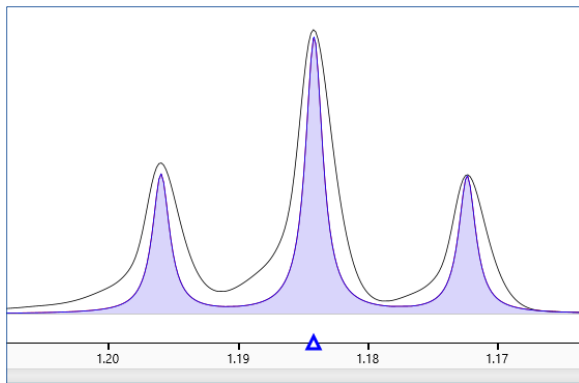

Spectrum fit using Chenomx NMR suite 9.0. Reference spectrum from crotamine treated cells. Black lines are from real NMR spectrum while blue shadows are metabolite signals from the Chenomx library. Chemical shift values may be observed on the x-axis.

# FORMATE

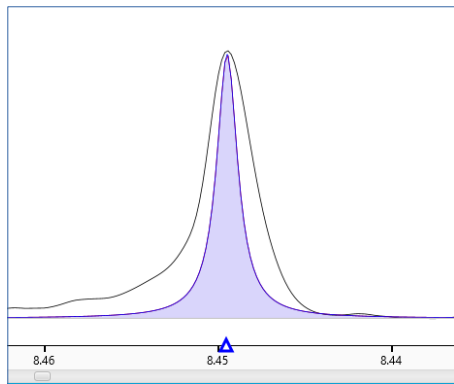

Spectrum fit using Chenomx NMR suite 9.0. Reference spectrum from crotamine treated cells. Black lines are from real NMR spectrum while blue shadows are metabolite signals from the Chenomx library. Chemical shift values may be observed on the x-axis.

# FORMATE

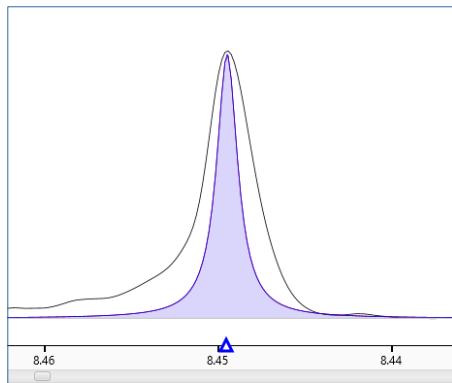

Spectrum fit using Chenomx NMR suite 9.0. Reference spectrum from crotamine treated cells. Black lines are from real NMR spectrum while blue shadows are metabolite signals from the Chenomx library. Chemical shift values may be observed on the x-axis.

# GLUCOSE part #1

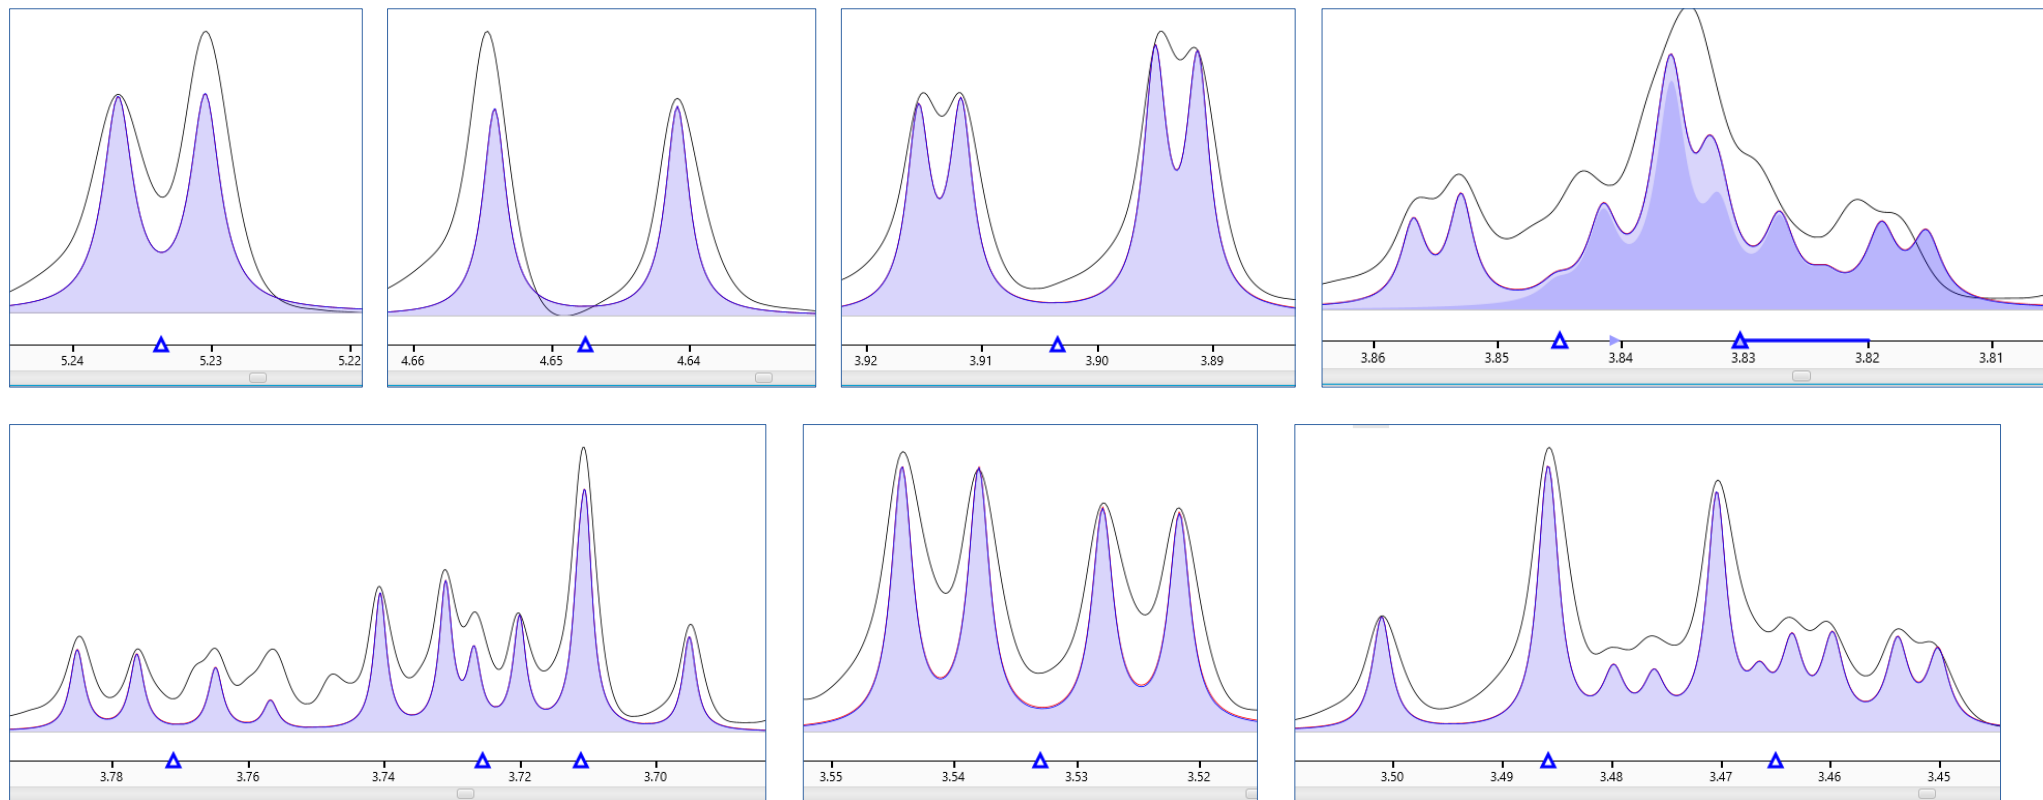

Spectrum fit using Chenomx NMR suite 9.0. Reference spectrum from crotamine treated cells. Black lines are from real NMR spectrum while blue shadows are metabolite signals from the Chenomx library. Chemical shift values may be observed on the x-axis.

## GLUCOSE part #2

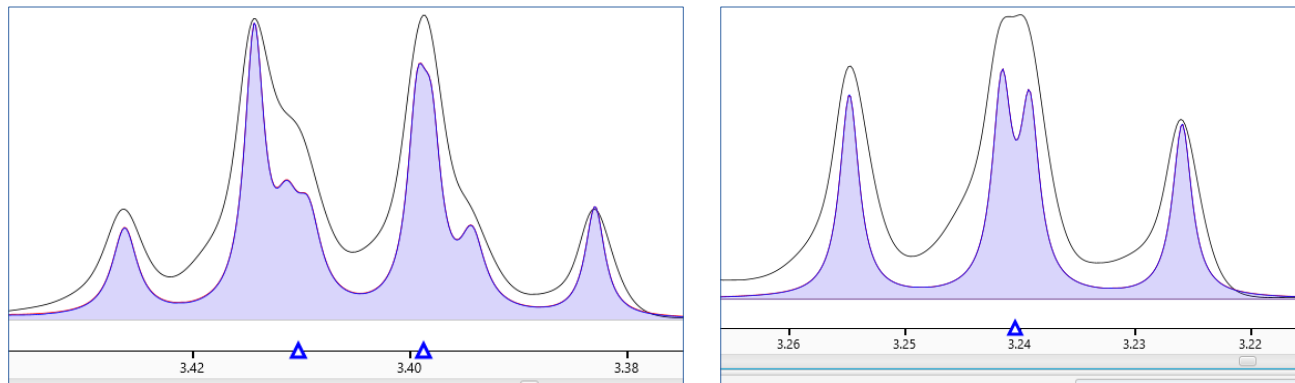

Spectrum fit using Chenomx NMR suite 9.0. Reference spectrum from crotamine treated cells. Black lines are from real NMR spectrum while blue shadows are metabolite signals from the Chenomx library. Chemical shift values may be observed on the x-axis.

# ISOLEUCINE

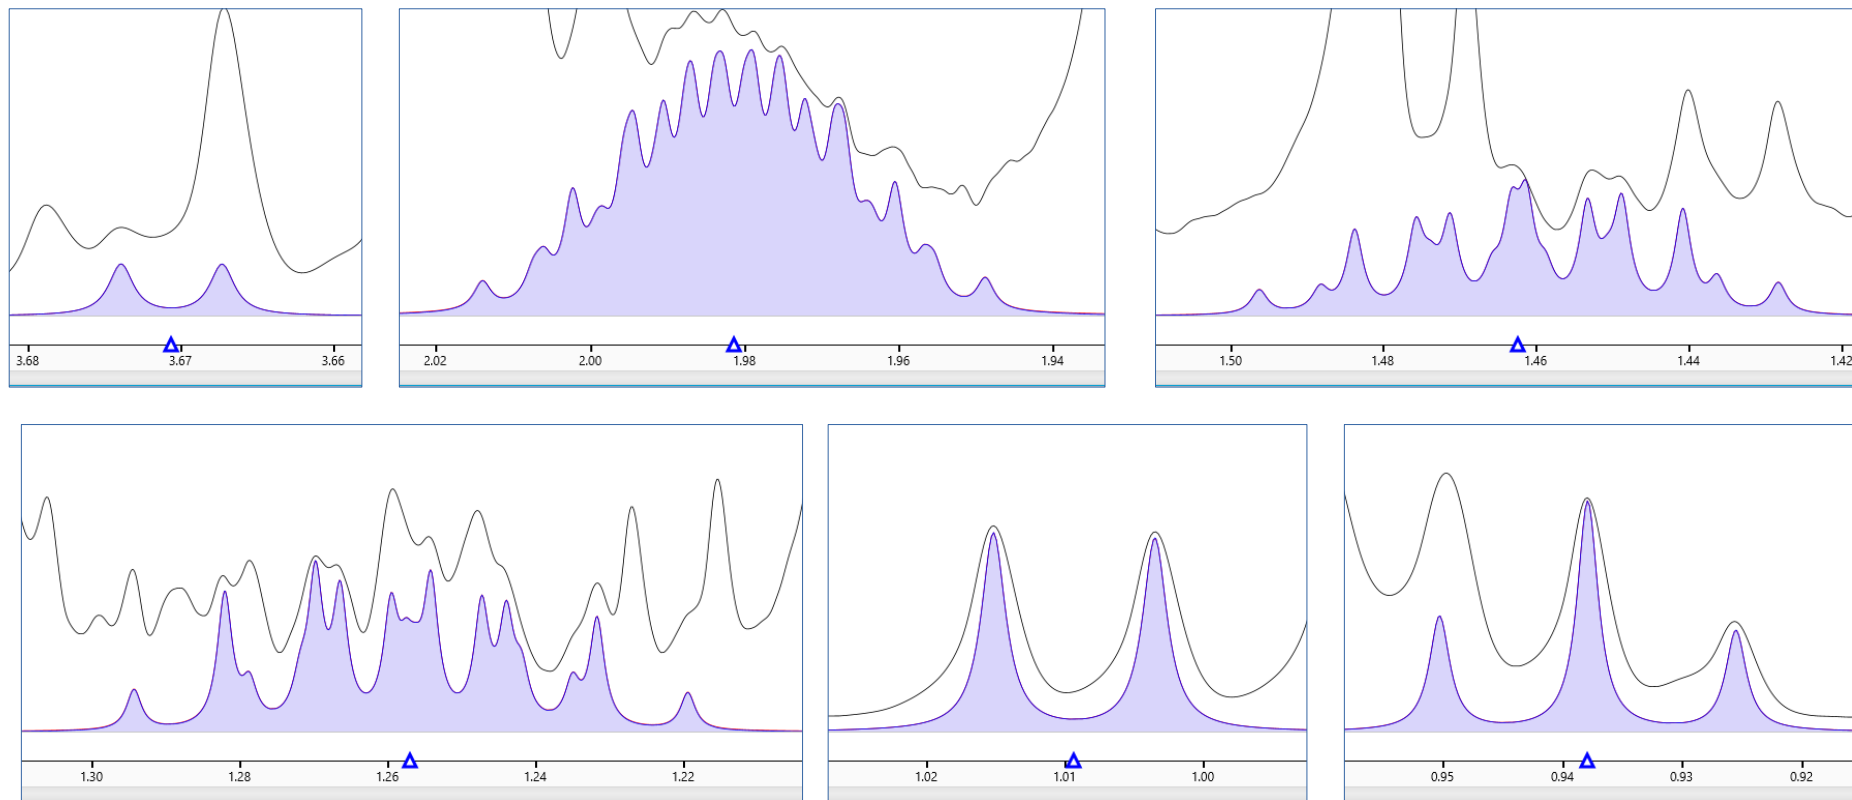

Spectrum fit using Chenomx NMR suite 9.0. Reference spectrum from crotonine treated cells. Black lines are from real NMR spectrum while blue shadows are metabolite signals from the Chenomx library. Chemical shift values may be observed on the x-axis.

# LACTATE

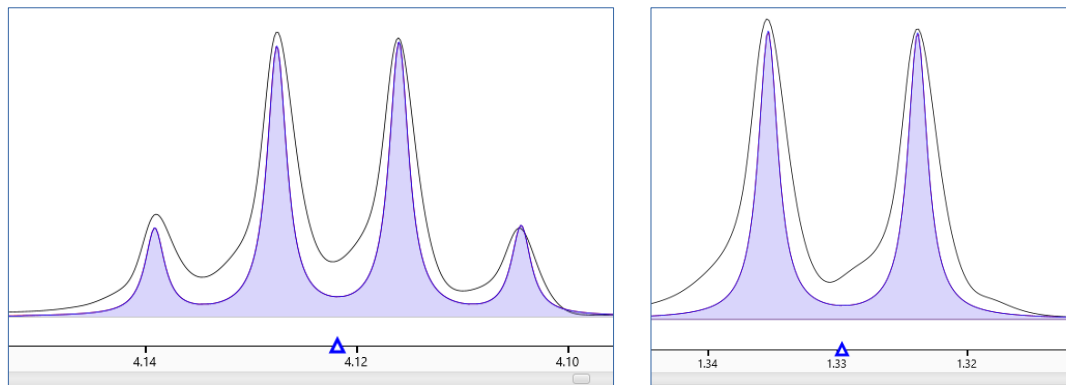

Spectrum fit using Chenomx NMR suite 9.0. Reference spectrum from crotamine treated cells. Black lines are from real NMR spectrum while blue shadows are metabolite signals from the Chenomx library. Chemical shift values may be observed on the x-axis.

# LEUCINE

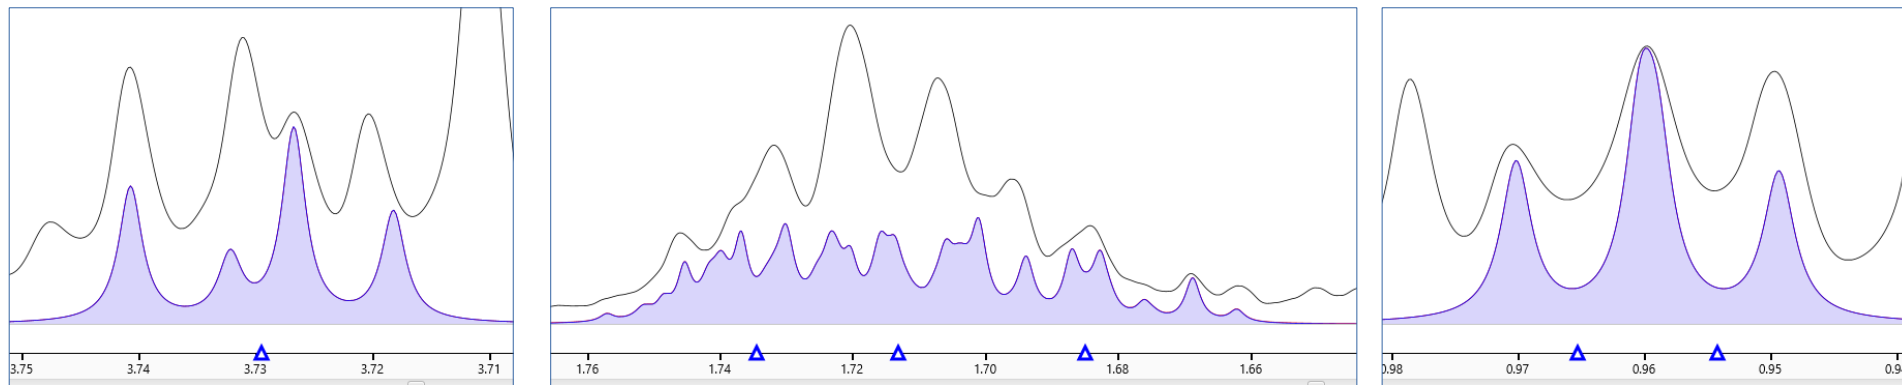

Spectrum fit using Chenomx NMR suite 9.0. Reference spectrum from crotonine treated cells. Black lines are from real NMR spectrum while blue shadows are metabolite signals from the Chenomx library. Chemical shift values may be observed on the x-axis.

# LYSINE

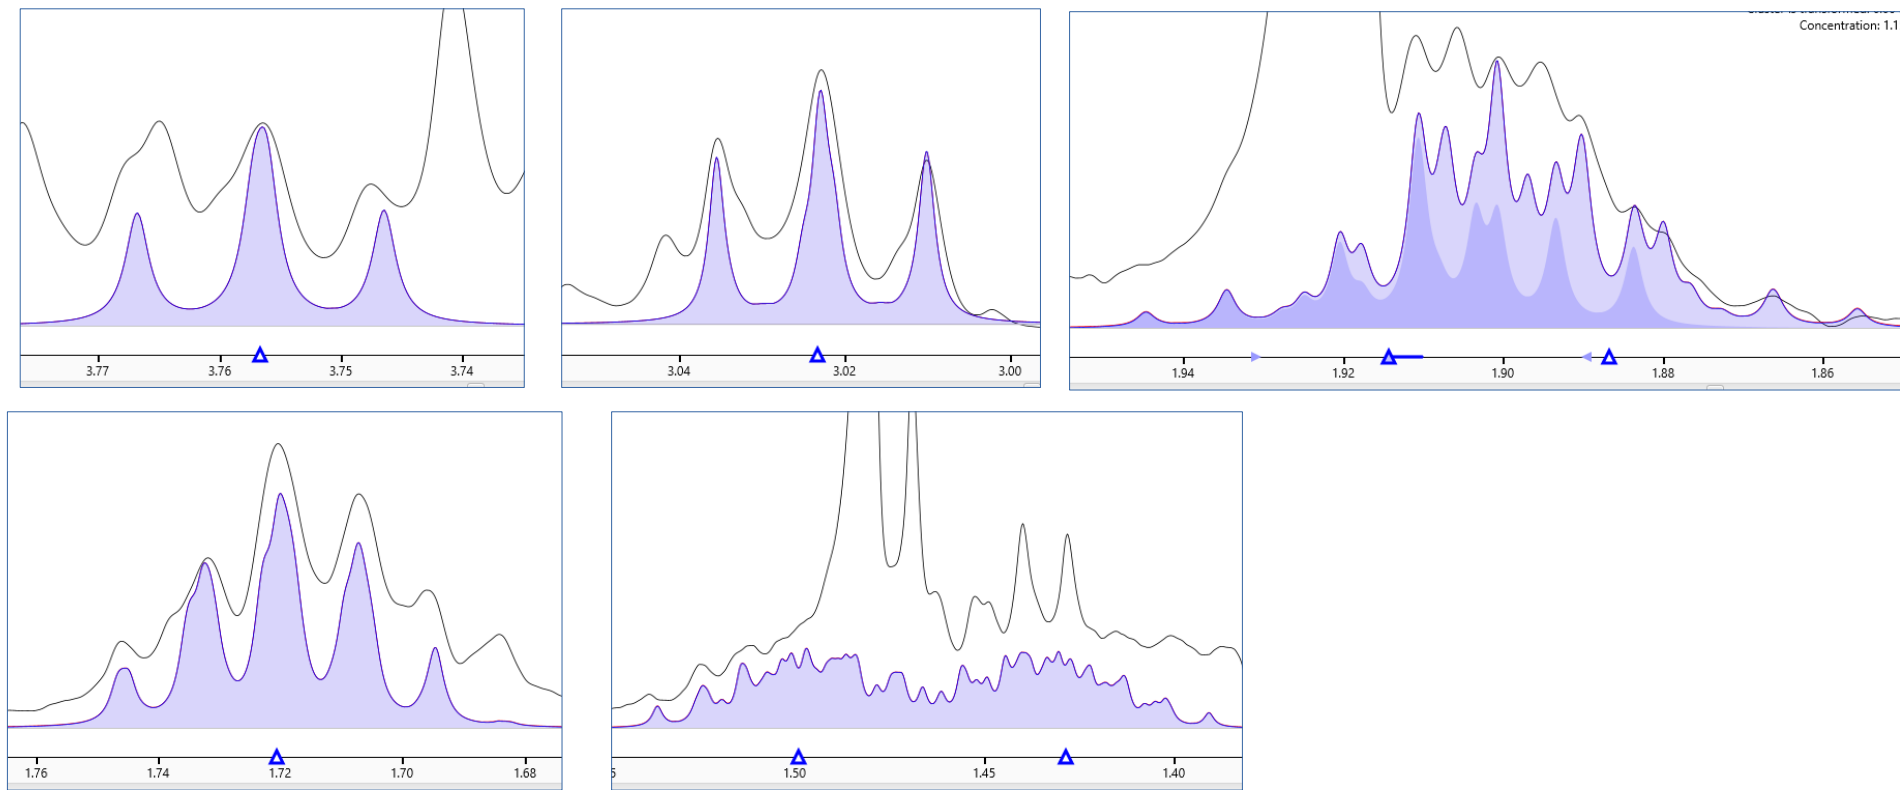

Spectrum fit using Chenomx NMR suite 9.0. Reference spectrum from crotamine treated cells. Black lines are from real NMR spectrum while blue shadows are metabolite signals from the Chenomx library. Chemical shift values may be observed on the x-axis.

# PHENYLALANINE

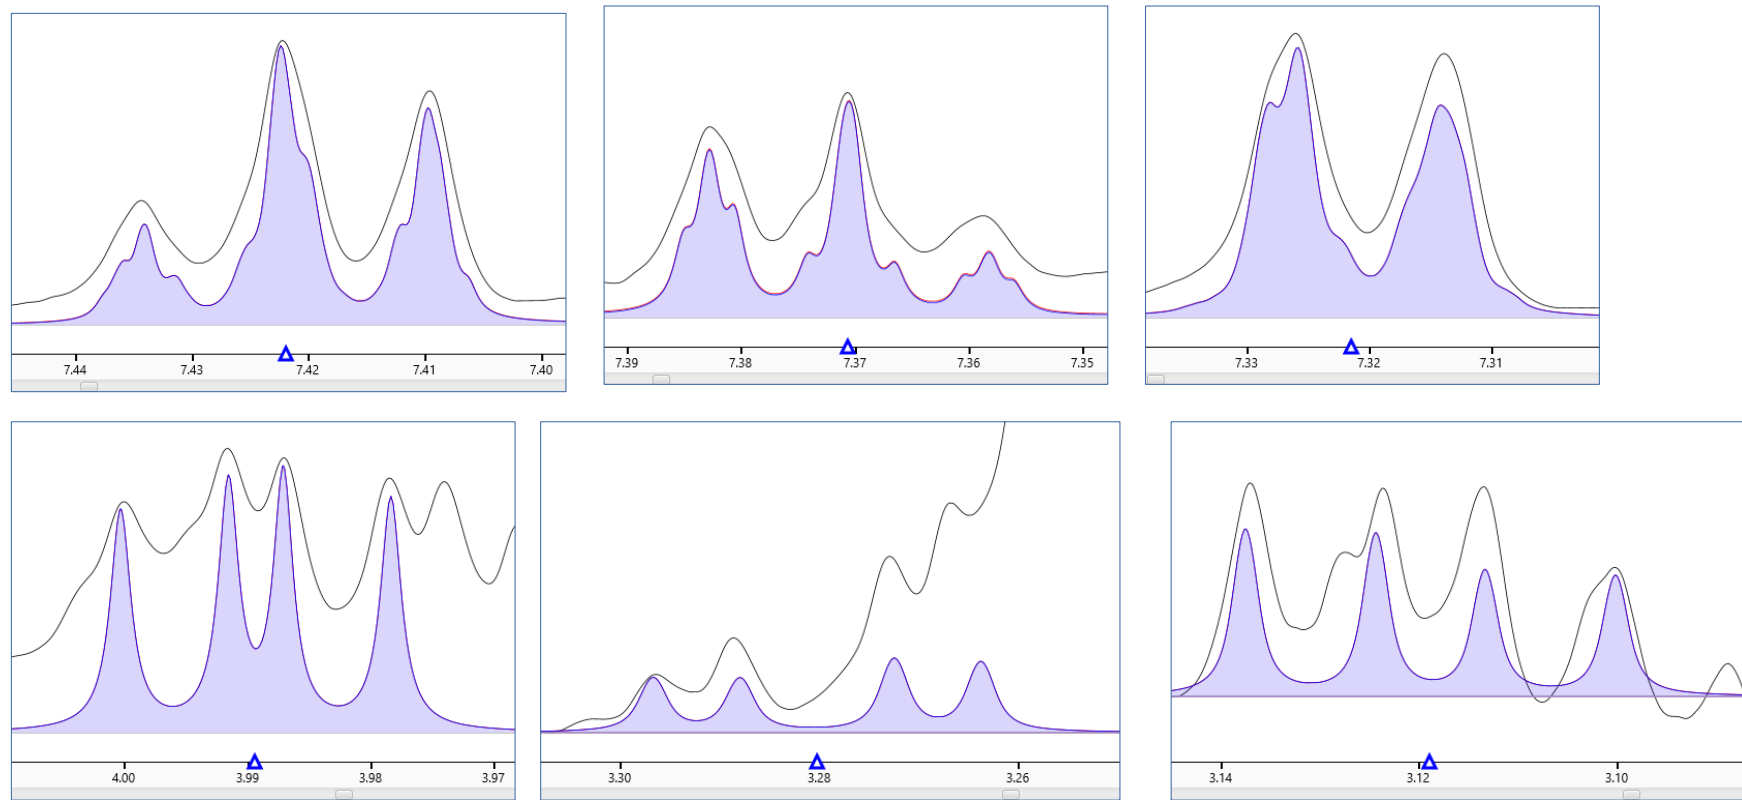

Spectrum fit using Chenomx NMR suite 9.0. Reference spectrum from crotamine treated cells. Black lines are from real NMR spectrum while blue shadows are metabolite signals from the Chenomx library. Chemical shift values may be observed on the x-axis.

# PYROGLUTAMATE

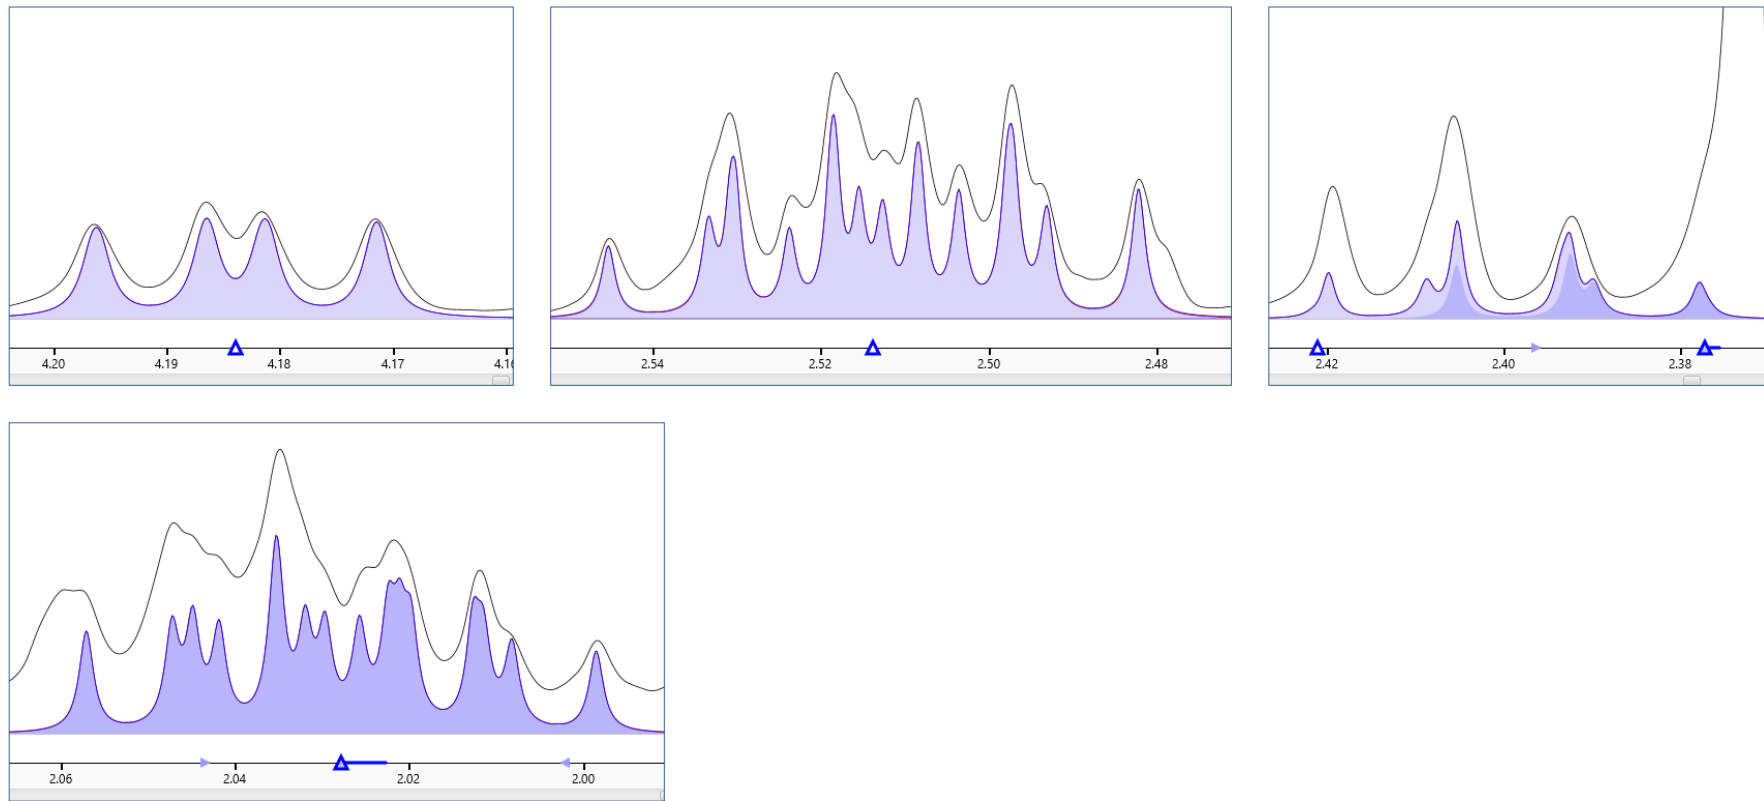

Spectrum fit using Chenomx NMR suite 9.0. Reference spectrum from crotamine treated cells. Black lines are from real NMR spectrum while blue shadows are metabolite signals from the Chenomx library. Chemical shift values may be observed on the x-axis.

# PYRUVATE

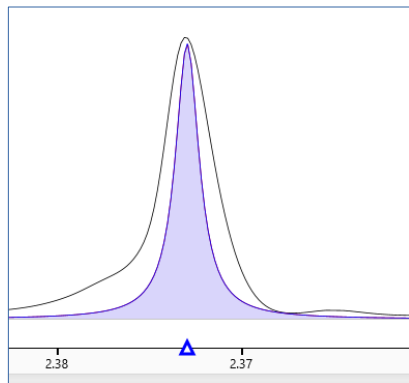

Spectrum fit using Chenomx NMR suite 9.0. Reference spectrum from crotamine treated cells. Black lines are from real NMR spectrum while blue shadows are metabolite signals from the Chenomx library. Chemical shift values may be observed on the x-axis.

# THREONINE

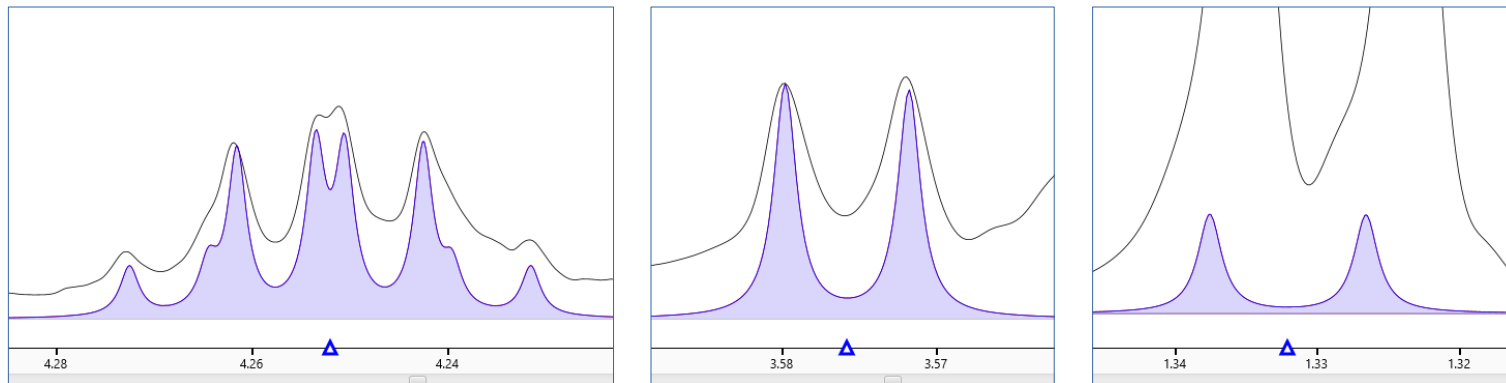

Spectrum fit using Chenomx NMR suite 9.0. Reference spectrum from crotamine treated cells. Black lines are from real NMR spectrum while blue shadows are metabolite signals from the Chenomx library. Chemical shift values may be observed on the x-axis.

# TYROSINE

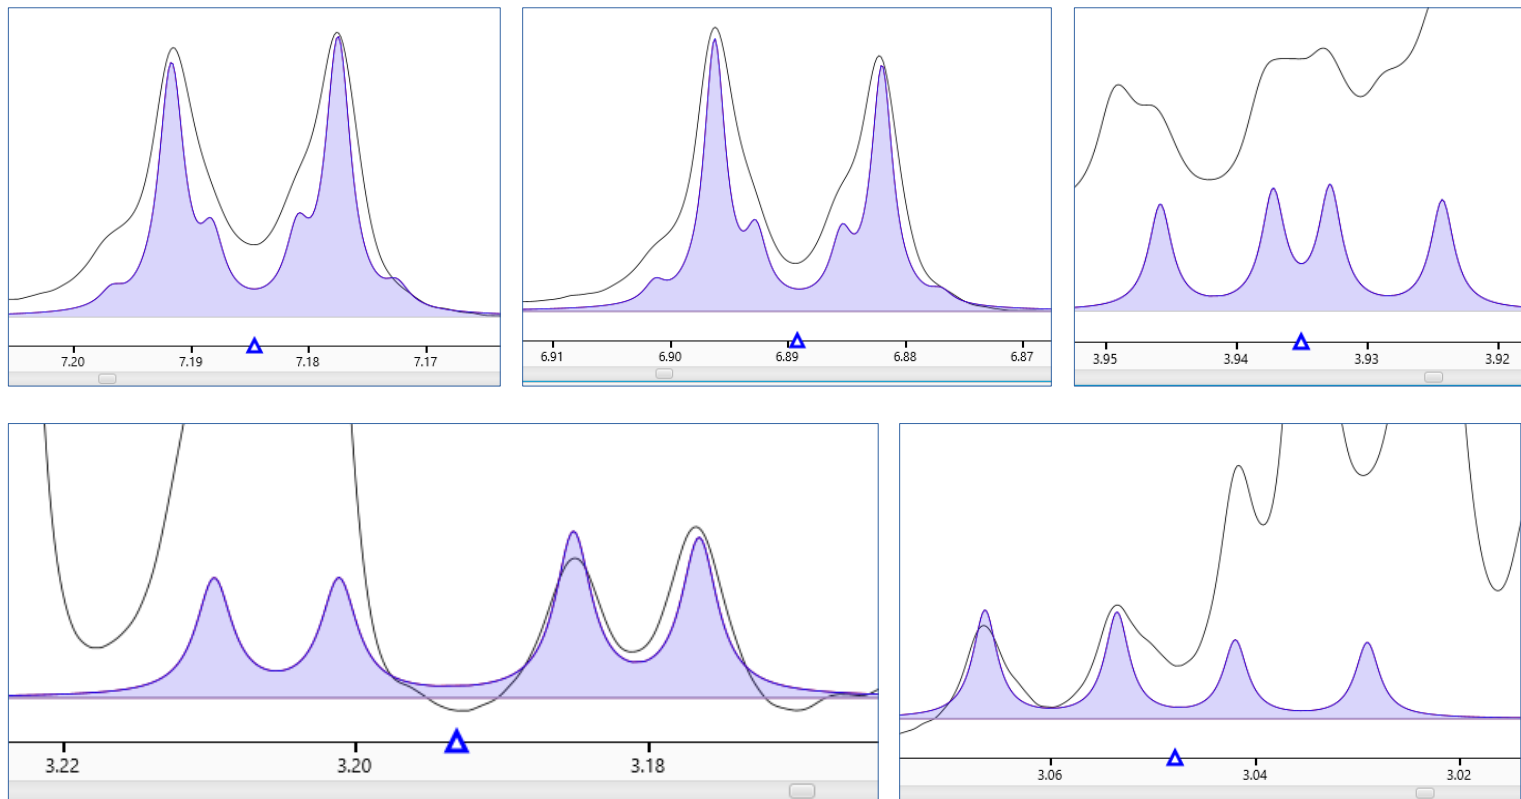

Spectrum fit using Chenomx NMR suite 9.0. Reference spectrum from crotamine treated cells. Black lines are from real NMR spectrum while blue shadows are metabolite signals from the Chenomx library. Chemical shift values may be observed on the x-axis.

# VALINE

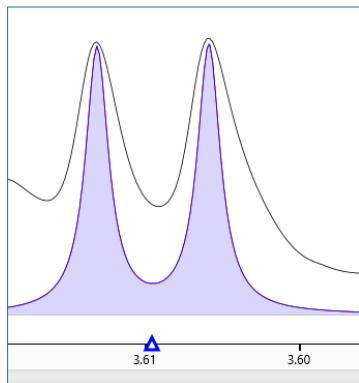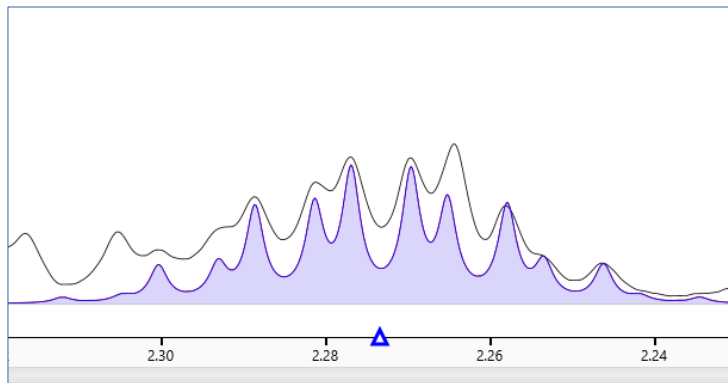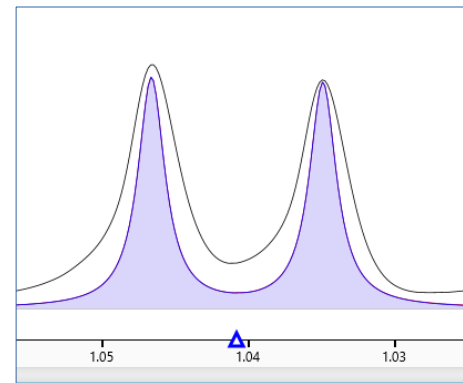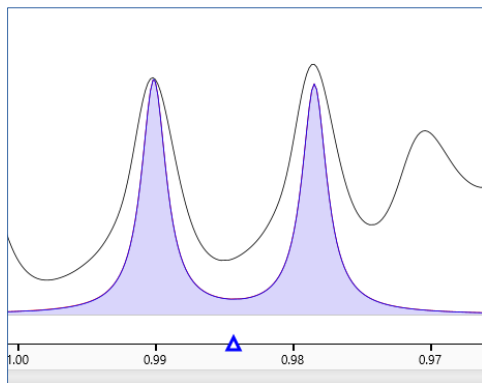

Spectrum fit using Chenomx NMR suite 9.0. Reference spectrum from crotamine treated cells. Black lines are from real NMR spectrum while blue shadows are metabolite signals from the Chenomx library. Chemical shift values may be observed on the x-axis.
